# Supplementary material for: In Silico Prediction and Design of Uropathogenic Escherichia coli Alpha-Hemolysin Generate a Soluble and Hemolytic Recombinant Toxin
Source: MDPI journal article supplement (doi:10.3390/microorganisms10010172), 2022-01-14
Supplement: s1 [file s1]

CLUSTAL O(1.2.4) multiple sequence alignment

```

HlyA      ----- 0
sp|P09983| MPTITAAQIKSTLQSAKQSAANKLHSAQSTKDALKKAAEQTRNAGNRLILLIPKDYKGQ 60

HlyA      ----- 0
sp|P09983| GSSLNDLVRTADELGIQYDEKNGTAITKQVFGTAEKLIQLTERGVTFIFAPQLDKLLQK 120

HlyA      ----- 0
sp|P09983| YQKAGNKLGGSAENIGDNLGKAGSVLSTFQNLFGTALSSMKIDELIKKQKSGGNVSSSEL 180

HlyA      ----- 0
sp|P09983| AKASIELINQLVDTAASLNNVNSFSQQLNKLGSVLSNTKHLNGVGNKLQNLPLNDNIGAG 240

HlyA      ----- 0
sp|P09983| LDTVSGILSAISASFILSNADADTGTKAAAGVELTKVLGNVKGKISQYIIAQRAAQGLS 300

HlyA      ----- 0
sp|P09983| TSAAAAGLIASVVTLAISPLSFLSIADKFKRANKIEEYSQRFKKLGYDGDSSLAAAFHKET 360

HlyA      ----- 0
sp|P09983| GAIDASLTRISTVLASVSSGISAAATSLVGAPVSALVGAVTGIIISGILEASKQAMFEHV 420

HlyA      ----- 0
sp|P09983| ASKMADVIAEWKKGKKNYFENGYDARHAAFLDNFKILSQYNKEYSVERSVLITQQHWD 480

HlyA      ----- 0
sp|P09983| TLIGELAGVTRNGDKTSLGKSYIDIYEEGKRLEKPPDEFQKQVFDPLKGNIDLSDSKSST 540

HlyA      LLKFVTPLLTPGEEIRERRQSGKYEYITELLVKGVDKWTVKGVQDKGSDYDYNLIQHAS 60
sp|P09983| LLKFVTPLLTPGEEIRERRQSGKYEYITELLVKGVDKWTVKGVQDKGSDYDYNLIQHAS 600
*****

HlyA      VGNNQYREIRIESHLGDGDDKVFLSAGSANIYAGKGHDVVYYDKTDTGYLTIDGTKATEA 120
sp|P09983| VGNNQYREIRIESHLGDGDDKVFLSAGSANIYAGKGHDVVYYDKTDTGYLTIDGTKATEA 660
*****

HlyA      GNYTVTRVLGGDVKVLQEVVKEQEVSVGKRTEKTQYRSYEFTHINGKNLTETDNLYSVEE 180
sp|P09983| GNYTVTRVLGGDVKVLQEVVKEQEVSVGKRTEKTQYRSYEFTHINGKNLTETDNLYSVEE 720
*****

HlyA      LI----- 182
sp|P09983| LIGTTRADKFFGSKFADIFHGADGDDHIEGNDGNDRLYGDKGNDTLSGGNGDDQLYGGDG 780
**

HlyA      ----- 182
sp|P09983| NDKLIGGAGNNYLNGGDGDELQVQGNLAKNVLSGGKGNDKLYGSEGADLLDGGEGNDL 840

HlyA      ----- 182
sp|P09983| LKGGYGNDIYRYSYGHHIIDDDGGKDDKLSLADIDFRDVAFRREGNDLIMYKAEGNVL 900

HlyA      ----- 182
sp|P09983| SIGHKNGITFKNWFEKESGDISNHQIEQIFDKDGRVITPDSLKKALEYQQSNNKASYVYG 960

HlyA      ----- 182
sp|P09983| NDALAYGSQGNLNLPLINEISKIISAAGNFDVKEERAAASLLQLSGNASDFSYGRNSITLT 1020

HlyA      --- 182
sp|P09983| ASA 1023

```

**Figure S1.** Alignment between P09983 and alpha-hemolysin, indicating that the peptides matched to P09983 are between positions 543 and 717 of the whole hemolysin.
